# Supplementary material for: Microwave-assisted synthesis of ZnO micro-javelins
Source: Royal Society of Chemistry journal article supplement (doi:10.1039/b912537j), 2009-01-01
Supplement: b912537j.pdf [file b912537j.pdf]

## Microwave assisted synthesis of ZnO micro-javelins

**Sibu C. Padmanabhan,<sup>\*a,b</sup> Deirdre Ledwith,<sup>b</sup> Suresh C. Pillai,<sup>c</sup> Declan E. McCormack<sup>d</sup> and John M. Kelly<sup>\*b</sup>**

<sup>a</sup> Current address: Tyndall National Institute, University College of Cork, ‘‘Lee Maltings’’ Prospect Row, Cork, Ireland. Fax: +353 21 4904467;

Tel: +353 21 4904406; E-mail: [sibu.padmanabhan@tyndall.ie](mailto:sibu.padmanabhan@tyndall.ie)

<sup>b</sup> School of Chemistry, Trinity College, University of Dublin, Dublin 2, Ireland.

Fax: +353 1 6712826; Tel: +353 1 8961947; E-mail: [jmkelly@tcd.ie](mailto:jmkelly@tcd.ie)

<sup>c</sup> Centre for Research in Engineering Surface Technology (CREST), FOCAS Institute, Dublin Institute of Technology, Camden Row, Dublin 8, Ireland,

Fax: +353 1 4027941; Tel: +353 1 4027946; E-mail: [suresh.pillai@dit.ie](mailto:suresh.pillai@dit.ie)

<sup>d</sup> School of Chemical and Pharmaceutical Sciences, Dublin Institute of Technology, Kevin Street, Dublin 8, Ireland. Fax: +353 1 4024989; Tel: +353 1 4024778;

E-mail: [declan.mccormack@dit.ie](mailto:declan.mccormack@dit.ie)

## Electronic Supplementary Information

**ESI 1; Fig. 1:** SEM of sample prepared by 20 min. of MW irradiation between 40 mL each of 10 mM zinc nitrate and 10 mM urea (1:1)

**ESI 1; Fig. 2:** SEM of sample prepared by 20 min. of MW irradiation between 40 mL each of 100 mM zinc nitrate and 100 mM urea (10:10)

**ESI 2; Fig. 1:** XRD of samples prepared by varying time of irradiation (● -  $\text{Zn}_5(\text{CO}_3)_2(\text{OH})_6$  /  $\text{Zn}_4\text{CO}_3(\text{OH})_6 \cdot \text{H}_2\text{O}$ ; ■ – from the instrument)

**ESI 2; Fig. 2:** XRD of sample prepared by 12 and 13 min of MW irradiation (● -  $\text{Zn}_5(\text{CO}_3)_2(\text{OH})_6$  /  $\text{Zn}_4\text{CO}_3(\text{OH})_6 \cdot \text{H}_2\text{O}$ ; ■ – from the instrument)

**ESI 3; Fig. 1:** FTIR spectra of ZnO micro-javelins prepared at various reaction times

**ESI 4; Table 1:** Details of MW conditions and corresponding pH, % yield and soluble zinc species concentrations.

**ESI 4; Fig. 1:** SEM of sample prepared by irradiating the already microwaved solution (150W 14 min) for 18 min. after adjusting the pH to 10 (\*). The surface texture is rough due to the dissolution of the particles. (size ~13  $\mu\text{m}$ )

**ESI 5; Fig. 1:** SEM image of 500 °C calcined product of the ammonium carbamate and zinc nitrate reaction.

**ESI 6; Table 1:** Thermodynamic equilibria for  $\text{ZnO}(\text{s})\text{-H}_2\text{O}$  and  $\text{Zn}(\text{OH})_2(\text{s})\text{-H}_2\text{O}$  systems.

**ESI 6; Table 2:** Thermodynamic data for  $\text{ZnO}(\text{s})$ ,  $\text{Zn}(\text{OH})_2(\text{s})$  and soluble species at 298 K.

**ESI 6; Fig. 1:** Phase stability diagrams for the  $\text{ZnO}(\text{s})\text{-H}_2\text{O}$  (a) and  $\text{Zn}(\text{OH})_2(\text{s})\text{-H}_2\text{O}$  (b) systems at 25 °C as a function of pH. An equilibrium between  $\text{Zn}(\text{OH})^{3-}$  and the solid phase is out of the range (Taken from references mentioned in 36. Thermodynamic data of the phases can also be found therein).

**ESI 7; Fig. 1:** Carbonate-bicarbonate phase distribution diagram. Solubility product of carbonate at pH 8 is  $8.5 \times 10^{-4}$ .

**ESI 1:** SEM images of particles prepared by varying the concentrations of zinc nitrate and urea.

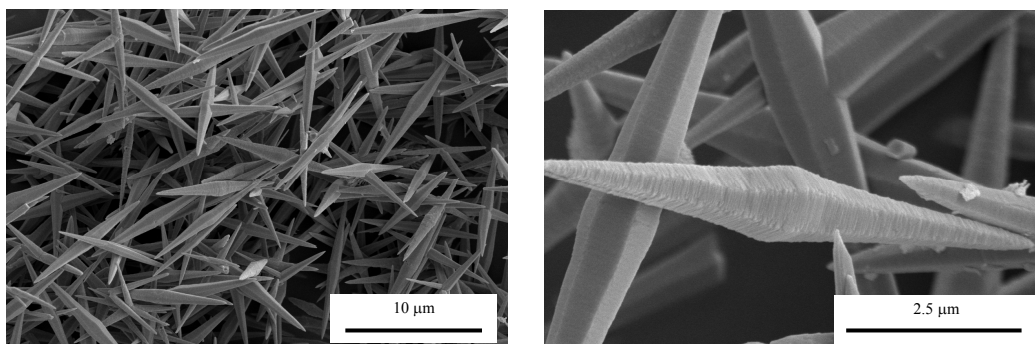

**ESI 1; Fig. 1:** SEM of sample prepared by 20 min. of MW irradiation between 40 mL each of 10 mM zinc nitrate and 10 mM urea (1:1)

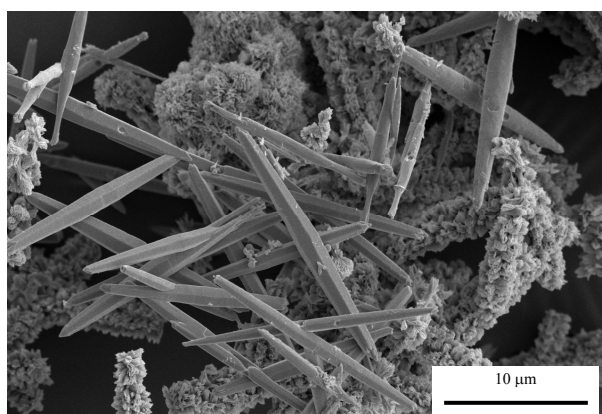

**ESI 1; Fig. 2:** SEM of sample prepared by 20 min. of MW irradiation between 40 mL each of 100 mM zinc nitrate and 100 mM urea (10:10)

ESI 2: XRD patterns

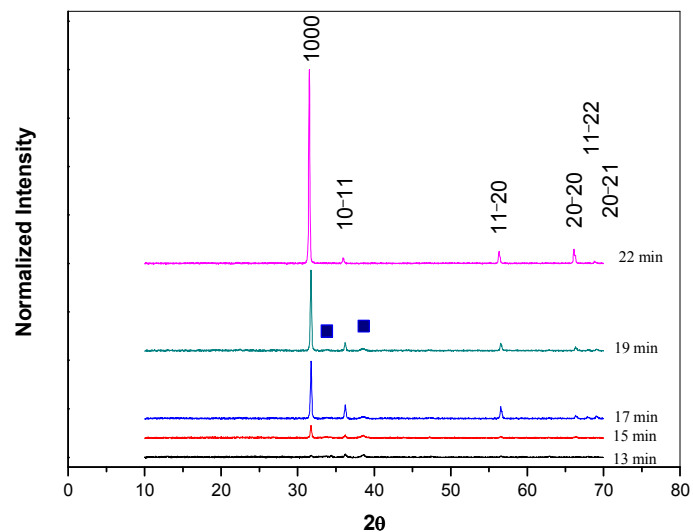

ESI 2; Fig. 1: XRD of samples prepared by varying time of irradiation (● -  $\text{Zn}_5(\text{CO}_3)_2(\text{OH})_6$ ; ■ – from the instrument)

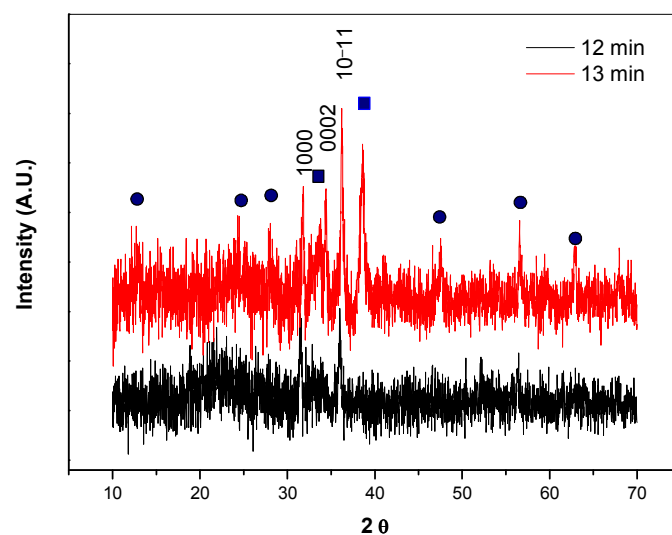

ESI 2; Fig. 2: XRD of sample prepared by 12 and 13 min of MW irradiation (● -  $\text{Zn}_5(\text{CO}_3)_2(\text{OH})_6$ ; ■ – from the instrument)

**ESI 3:** FTIR spectra of ZnO micro-javelins prepared at various reaction times

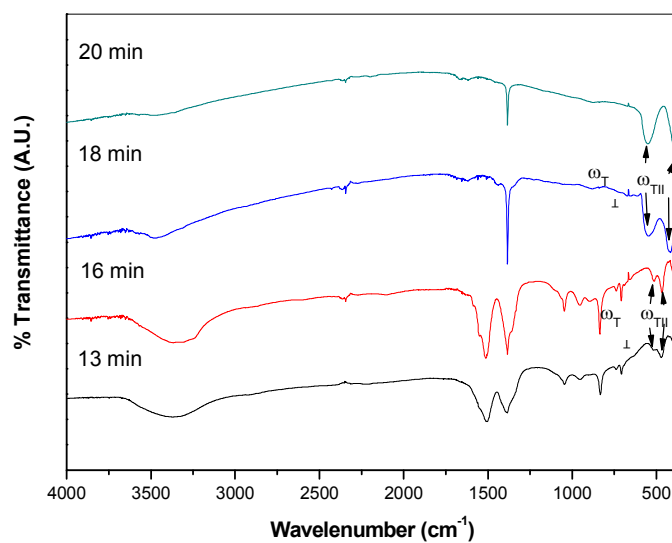

**ESI 3; Fig. 1:** FTIR spectra of ZnO micro-javelins prepared at various reaction times

**ESI 4:** Details of reactions and products.

**ESI 4; Table 1:** Details of MW conditions and corresponding pH, % yield and soluble zinc species concentrations.

| Irradiation Time (min) | pH    | Yield (%) | Soluble Zn <sup>2+</sup> ion concentration (mg) |
|------------------------|-------|-----------|-------------------------------------------------|
| 10                     | 6.11  | --        | 21.9170                                         |
| 11                     | 6.81  | 5         | 18.4423                                         |
| 12                     | 6.88  | 41        | 13.364                                          |
| 13                     | 7.04  | 110       | 3.2074                                          |
| 14                     | 7.38  | 82        | 2.9401                                          |
| 15                     | 8.62  | 95        | 2.6728                                          |
| 16                     | 8.72  | 94        | 1.6037                                          |
| 17                     | 9.01  | 93        | 1.6037                                          |
| 18                     | 9.05  | 92        | 1.6037                                          |
| 19                     | 9.13  | 82        | 2.6728                                          |
| 20                     | 9.31  | 84        | 2.4055                                          |
| 22                     | 9.56  | 80        | 3.4746                                          |
| 24                     | 9.75  | 82        | 4.2765                                          |
| 14, 18*                | 9.87  | 73        | 5.8802                                          |
| 18 <sup>#</sup>        | 10.37 | 26        | 16.571                                          |

\*Preparation sequence: 150W 14 min. Allowed cooling. Adjusted the pH to ~10 with NH<sub>4</sub>OH. Microwaved again at 150 W for 18 min.

<sup>#</sup> Preparation sequence: Adjusted the pH of reactant mixture to ~10. Microwaved at 150 W for 18 min.

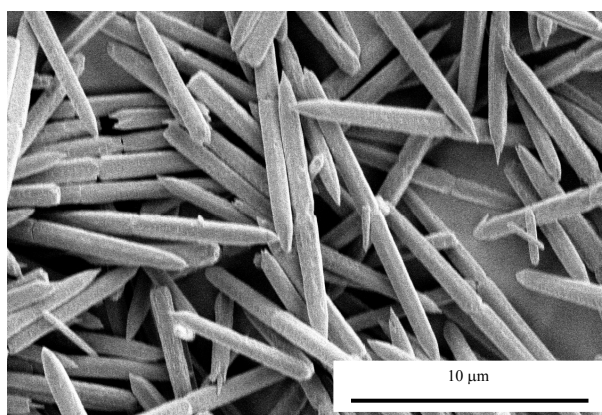

**ESI 4; Fig. 1:** SEM of sample prepared by irradiating the already microwaved solution (150W 14 min) for 18 min. after adjusting the pH to 10 (\*). The surface texture is rough due to the dissolution of the particles. (size ~13 μm)

**ESI 5:** SEM image of 500 °C calcined product of the ammonium carbamate reaction.

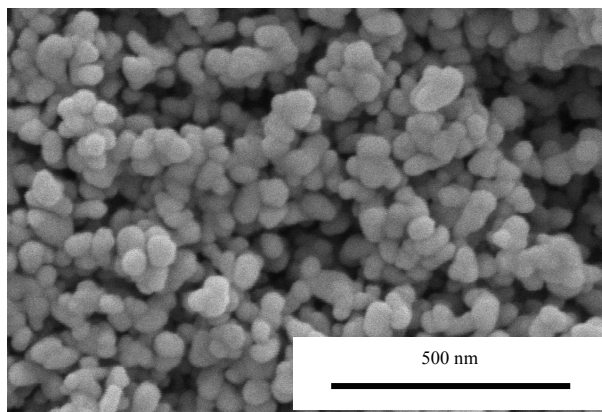

**ESI 5; Fig. 1:** SEM image of 500 °C calcined product of the ammonium carbamate and zinc nitrate reaction.

**ESI 6:** Thermodynamic data and phase diagrams of ZnO(s) and Zn(OH)<sub>2</sub>(s).

**ESI 6; Table 1:** Thermodynamic equilibria for ZnO(s)-H<sub>2</sub>O and Zn(OH)<sub>2</sub>(s)-H<sub>2</sub>O systems.

| ZnO(s)-H <sub>2</sub> O                               | Zn(OH) <sub>2</sub> (s)-H <sub>2</sub> O               |
|-------------------------------------------------------|--------------------------------------------------------|
| $\text{Zn}^{2+} + \text{H}_2\text{O} \leftrightarrow$ | $\text{Zn}^{2+} + 2\text{H}_2\text{O} \leftrightarrow$ |
| $\text{ZnO(s)} + 2\text{H}^+$                         | $\text{Zn(OH)}_2\text{(s)} + 2\text{H}^+$              |
| $\text{ZnOH}^+ \leftrightarrow$                       | $\text{ZnOH}^+ + \text{H}_2\text{O} \leftrightarrow$   |
| $\text{ZnO(s)} + \text{H}^+$                          | $\text{Zn(OH)}_2\text{(s)} + \text{H}^+$               |
| $\text{Zn(OH)}_2\text{(aq)} \leftrightarrow$          | $\text{Zn(OH)}_2\text{(aq)} \leftrightarrow$           |
| $\text{ZnO(s)} + \text{H}_2\text{O}$                  | $\text{Zn(OH)}_2\text{(s)}$                            |
| $\text{Zn(OH)}_3^- + \text{H}^+ \leftrightarrow$      | $\text{Zn(OH)}_3^- + \text{H}^+ \leftrightarrow$       |
| $\text{ZnO(s)} + 2\text{H}_2\text{O}$                 | $\text{Zn(OH)}_2\text{(s)} + \text{H}_2\text{O}$       |
| $\text{Zn(OH)}_4^{2-} + 2\text{H}^+ \leftrightarrow$  | $\text{Zn(OH)}_4^{2-} + 2\text{H}^+ \leftrightarrow$   |
| $\text{ZnO(s)} + 3\text{H}_2\text{O}$                 | $\text{Zn(OH)}_2\text{(s)} + 2\text{H}_2\text{O}$      |

**ESI 6; Table 2:** Thermodynamic data for ZnO(s), Zn(OH)<sub>2</sub>(s) and soluble species at 298 K.

| Species                 | $\Delta_f G^\circ / \text{kJ mol}^{-1}$ | Species                           | $\Delta_f G^\circ / \text{kJ mol}^{-1}$ |
|-------------------------|-----------------------------------------|-----------------------------------|-----------------------------------------|
| ZnO(s)                  | -318.3                                  | $\text{Zn}^{2+}(\text{aq})$       | -147.0                                  |
| Zn(OH) <sub>2</sub> (s) | -553.6                                  | $\text{ZnOH}^+(\text{aq})$        | -330.1                                  |
|                         |                                         | $\text{Zn(OH)}_2(\text{aq})$      | -522.3                                  |
| $\text{H}^+(\text{aq})$ | 0                                       | $\text{Zn(OH)}_3^-(\text{aq})$    | -694.3                                  |
| $\text{H}_2\text{O(l)}$ | -237.2                                  | $\text{Zn(OH)}_4^{2-}(\text{aq})$ | -858.7                                  |

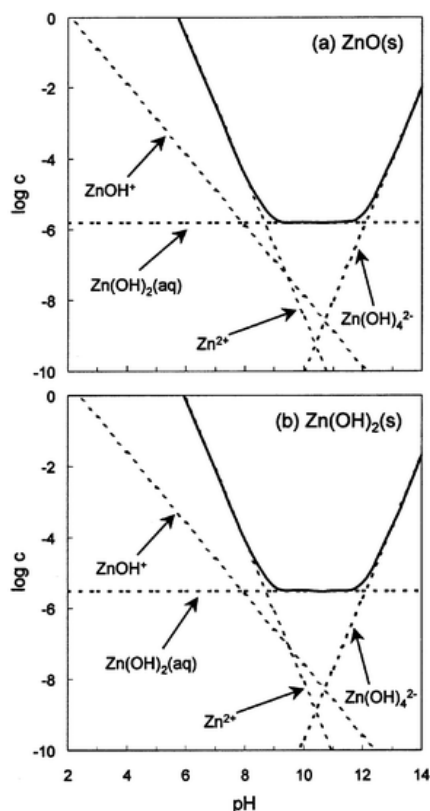

**ESI 6; Fig. 1:** Phase stability diagrams for the ZnO(s)-H<sub>2</sub>O (a) and Zn(OH)<sub>2</sub>(s)-H<sub>2</sub>O (b) systems at 25 °C as a function of pH. An equilibrium between Zn(OH)<sup>3-</sup> and the solid phase is out of the range (Taken from references mentioned in 36. Thermodynamic data of the phases can also be found therein).

ESI 7: Carbonate-bicarbonate phase distribution diagram

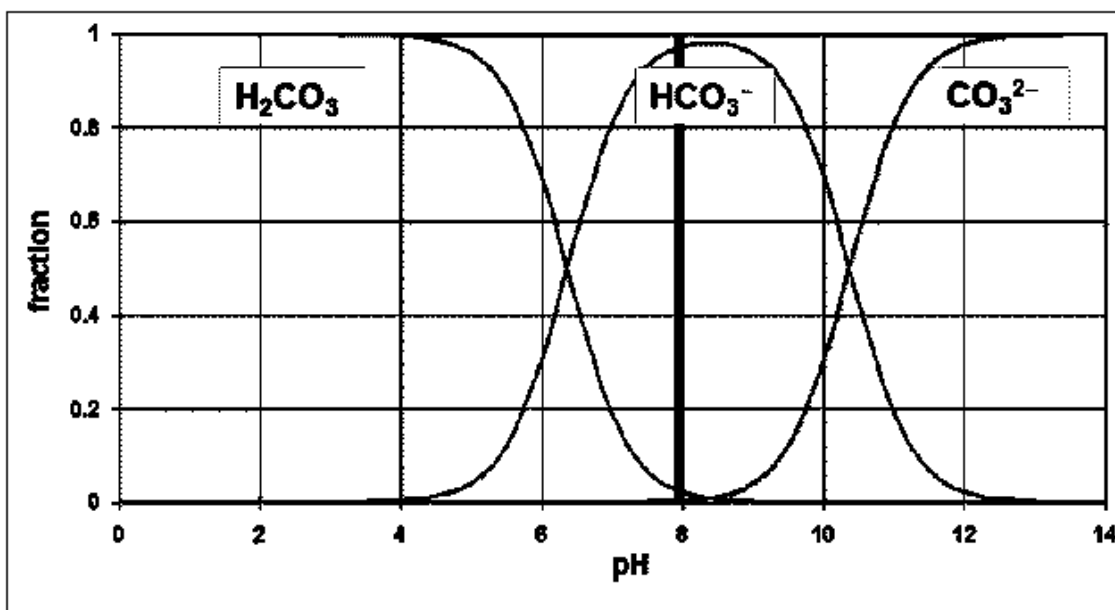

ESI 7; Fig. 1: Carbonate-bicarbonate phase distribution diagram. Solubility product of carbonate at pH 8 is  $8.5 \times 10^{-4}$ .
